# Supplementary material for: Hydrodynamics and multiscale order in confluent epithelia
Source: eLife. 2024 Jan 8;13:e86400. doi: 10.7554/eLife.86400 (PMC10963026; doi:10.7554/eLife.86400)
Supplement: Figure 3—source data 1. [file elife-86400-fig3-data1.xlsx]

## Sheet: Panel a
	Self Propelled Voronoi (SPV)				Multi-phase field (MPF)				Hydrodynamic Eqs. (2)
	Wavenumber	Struct Fact			Wavenumber	Struct Fact			Wavenumber	Struct Fact
	0.0628319	0.00454584			0.0628319	0.00454584			0.04	0.00104378
	0.0876657	0.0159605			0.0876657	0.0159605			0.08	0.0292916
	0.122315	0.0174676			0.122315	0.0174676			0.12	0.0875027
	0.136677	0.0119551			0.136677	0.0119551			0.16	0.232248
	0.170659	0.011209			0.170659	0.011209			0.2	0.0463407
	0.180401	0.0290374			0.180401	0.0290374			0.24	0.0396746
	0.190698	0.0159113			0.190698	0.0159113			0.28	0.0641688
	0.225253	0.0124552			0.225253	0.0124552			0.32	0.0251331
	0.238111	0.0422813			0.238111	0.0422813			0.36	0.0255835
	0.251703	0.0154156			0.251703	0.0154156			0.4	0.0186906
	0.26607	0.0180056			0.26607	0.0180056			0.44	0.0195524
	0.297312	0.0159089			0.297312	0.0159089			0.48	0.0153924
	0.314283	0.0110854			0.314283	0.0110854			0.52	0.013553
	0.332223	0.0178309			0.332223	0.0178309			0.56	0.0138498
	0.351187	0.0130696			0.351187	0.0130696			0.6	0.0114892
	0.371233	0.0117379			0.371233	0.0117379			0.64	0.0124209
	0.392423	0.01389			0.392423	0.01389			0.68	0.0100398
	0.414823	0.0115134			0.414823	0.0115134			0.72	0.00931454
	0.438502	0.0129913			0.438502	0.0129913			0.76	0.00943596
	0.463532	0.00963216			0.463532	0.00963216			0.8	0.00748337
	0.489991	0.010587			0.489991	0.010587			0.84	0.00794115
	0.51796	0.0102477			0.51796	0.0102477			0.88	0.00665274
	0.547526	0.0104757			0.547526	0.0104757			0.92	0.00637469
	0.578779	0.00969013			0.578779	0.00969013			0.96	0.00619962
	0.611817	0.0100942			0.611817	0.0100942			1	0.00562228
	0.64674	0.00919365			0.64674	0.00919365			1.04	0.00497505
	0.683657	0.00780898			0.683657	0.00780898			1.08	0.00447859
	0.72268	0.00799029			0.72268	0.00799029			1.12	0.00549278
	0.763932	0.00746075			0.763932	0.00746075			1.16	0.00443441
	0.807538	0.00792136			0.807538	0.00792136			1.2	0.00493514
	0.853633	0.00727775			0.853633	0.00727775			1.24	0.00434956
	0.90236	0.00739778			0.90236	0.00739778			1.28	0.00454189
	0.953867	0.00678986			0.953867	0.00678986			1.32	0.00556374
	1.00832	0.00647989			100832	0.00647989			1.36	0.00469169
	1.06587	0.00672114			106587	0.00672114			1.4	0.00595114
	1.12671	0.00723746			112671	0.00723746			1.44	0.00546439
	1.19103	0.00703845			119103	0.00703845			1.48	0.00617129
	1.25901	0.00800844			125901	0.00800844			1.52	0.00759211
	1.33088	0.00837507			133088	0.00837507			1.56	0.00663845
	1.40684	0.00899895			140684	0.00899895			1.6	0.00977405
	1.48715	0.0106913			148715	0.0106913			1.64	0.0084775
	1.57204	0.0124427			157204	0.0124427			1.68	0.0122301
	1.66177	0.0144935			166177	0.0144935			1.72	0.0111897
	1.75663	0.0185147			175663	0.0185147			1.76	0.0110412
	0.18569	0.0233433			18569	0.0233433			1.8	0.018153
	1.96289	0.030662			196289	0.030662			1.84	0.0146706
	2.07494	0.0400245			207494	0.0400245			1.88	0.0219336
	2.19337	0.0577256			219337	0.0577256			1.92	0.0189574
	2.31858	0.0817711			231858	0.0817711			1.96	0.0196009
	2.45092	0.123736			245092	0.123736			2	0.0320058
	2.59082	0.185297			259082	0.185297			2.04	0.0246848
	2.73871	0.282721			273871	0.282721			2.08	0.0388657
	2.89504	0.411289			289504	0.411289			2.12	0.031338
	3.06029	0.578858			306029	0.578858			2.16	0.0406771
	3.23498	0.731674			323498	0.731674			2.2	0.044044
	3.41963	0.819103			341963	0.819103			2.24	0.0372378
	3.61483	0.813569			361483	0.813569			2.28	0.0607977
	3.82117	0.761872			382117	0.761872			2.32	0.0444582
	4.03928	0.739817			403928	0.739817			2.36	0.0598506
	4.26985	0.726206			426985	0.726206			2.4	0.0565744
	4.51358	0.695886			451358	0.695886			2.44	0.0473876
	4.77122	0.730648			477122	0.730648			2.48	0.0779509
	5.04357	0.757753			504357	0.757753			2.52	0.0502108
									2.56	0.0759673
									2.6	0.0529135
									2.64	0.0572701
									2.68	0.0687087
									2.72	0.0485774
									2.76	0.0722777
									2.8	0.0472567
									2.84	0.0607771
									2.88	0.0510286
									2.92	0.041573
									2.96	0.0625833
									3	0.039139
									3.04	0.0524431
									3.08	0.0403868
									3.12	0.0346516
									3.16	0.0484608
									3.2	0.0293279
									3.24	0.0407483
									3.28	0.0293511
									3.32	0.0315845
									3.36	0.0305219
									3.4	0.0213981
									3.44	0.0305098
									3.48	0.020474
									3.52	0.0252908
									3.56	0.0185111
									3.6	0.0148455
									3.64	0.0222391
									3.68	0.012829
									3.72	0.0173801
									3.76	0.012156
									3.8	0.0117453
									3.84	0.0133622
									3.88	0.00881413
									3.92	0.0120544
									3.96	0.00842407
									4	0.00950862
									4.04	0.00820681
									4.08	0.00622343
									4.12	0.00871313
									4.16	0.00598639
									4.2	0.00721388
									4.24	0.00577326
									4.28	0.0050807
									4.32	0.00601589
									4.36	0.0042743
									4.4	0.00571994
									4.44	0.00378861
									4.48	0.00431592
									4.52	0.00385244
									4.56	0.00296373
									4.6	0.00427297
									4.64	0.00264289
									4.68	0.00345628
									4.72	0.00242562
									4.76	0.00207416
									4.8	0.00316362
									4.84	0.00182472
									4.88	0.00261264
									4.92	0.00174162
									4.96	0.00191153
									5	0.00189101
									5.04	0.00131547
									5.08	0.00200679

## Sheet: Panel b
	Self Propelled Voronoi (SPV)				Multi-phase field (MPF)
	Peclet	Slope	Error		Peclet	Slope	Error
	0.1	5802	0.200		0	5.64701	0.732036
	0.2	6006	0.222		0.208333	6.35523	0.550137
	0.3	6057	0.205		0.416667	6.43663	0.900697
	0.4	6005	0.147		0.625	6.52574	0.440404
	0.5	5689	0.135		0.833333	5.80872	0.23285
	0.6	5586	0.172		1.04167	5.01985	0.188354
	0.7	5687	0.103		1.25	4.68318	0.162023
	0.8	5486	0.064		1.45833	4.27492	0.387416
	0.9	5309	0.068		1.66667	3.9517	0.382198
	0.10	5180	0.060		1.875	3.81135	0.363723
	0.11	4994	0.053		2.08333	3.70478	0.57307
	0.12	4842	0.088
	0.13	4845	0.075
	0.14	4723	0.073
	0.15	4539	0.069
	0.16	4466	0.071
	0.17	4397	0.063
	0.18	4328	0.080
	0.19	4218	0.078
	0.20	4161	0.097
