# Supplementary material for: Hydrodynamics and multiscale order in confluent epithelia
Source: eLife. 2024 Jan 8;13:e86400. doi: 10.7554/eLife.86400 (PMC10963026; doi:10.7554/eLife.86400)
Supplement: Figure 4—source data 1. [file elife-86400-fig4-data1.xlsx]

## Sheet: Panel a
	PASSIVE
	Distance r	Correlation	Err
	0	0.971334	0.016681
	2	0.97128	0.016701
	4	0.970909	0.016567
	6	0.970235	0.016595
	8	0.969259	0.016626
	10	0.967993	0.016587
	12	0.966442	0.016422
	14	0.964603	0.016391
	16	0.962485	0.016409
	18	0.960085	0.016339
	20	0.957412	0.016161
	22	0.954459	0.016069
	24	0.951233	0.015887
	26	0.947738	0.015831
	28	0.943972	0.015616
	30	0.939939	0.015469
	32	0.935642	0.015421
	34	0.93108	0.015184
	36	0.926261	0.015032
	38	0.921183	0.014916
	40	0.915854	0.014701
	42	0.910273	0.014487
	44	0.904447	0.014257
	46	0.898373	0.014104
	48	0.892061	0.01387
	50	0.885514	0.013641
	52	0.878735	0.0133
	54	0.871728	0.013125
	56	0.864497	0.012846
	58	0.857045	0.012608
	60	0.849379	0.012348
	62	0.841501	0.012068
	64	0.83342	0.011857
	66	0.825137	0.0116
	68	0.816658	0.011252
	70	0.80799	0.01084
	72	0.799135	0.010596
	74	0.7901	0.010192
	76	0.780888	0.010018
	78	0.77151	0.009621
	80	0.761968	0.009303
	82	0.752266	0.008925
	84	0.742414	0.008549
	86	0.732416	0.008264
	88	0.722276	0.007832
	90	0.712003	0.00752
	92	0.701604	0.007218
	94	0.691081	0.006834
	96	0.680445	0.006443
	98	0.669699	0.006066
	100	0.658852	0.005579
	102	0.647909	0.005258
	104	0.636878	0.004877
	106	0.625762	0.004458
	108	0.614574	0.004057
	110	0.603313	0.003701
	112	0.59199	0.003314
	114	0.580612	0.002925
	116	0.56919	0.002471
	118	0.557721	0.002112
	120	0.546221	0.001772
	122	0.534687	0.001345
	124	0.523136	0.001036
	126	0.51157	0.000683
	128	0.5	0.000534
	130	0.488427	0.000732
	132	0.476862	0.001016
	134	0.465311	0.001348
	136	0.453782	0.001722
	138	0.44228	0.002095
	140	0.430812	0.002474
	142	0.419386	0.002899
	144	0.40801	0.003295
	146	0.396689	0.003712
	148	0.385429	0.004165
	150	0.374239	0.004447
	152	0.363122	0.004862
	154	0.352092	0.005269
	156	0.34115	0.005672
	158	0.3303	0.006104
	160	0.319556	0.0064
	162	0.308918	0.006767
	164	0.298396	0.007104
	166	0.287997	0.007453
	168	0.277724	0.007859
	170	0.267586	0.008159
	172	0.257588	0.008547
	174	0.247735	0.008926
	176	0.238035	0.009271
	178	0.228494	0.009624
	180	0.219112	0.009969
	182	0.209903	0.010223
	184	0.200869	0.010615
	186	0.192014	0.010888
	188	0.183343	0.01119
	190	0.174863	0.011556
	192	0.166582	0.011762
	194	0.1585	0.012027
	196	0.150626	0.012345
	198	0.14296	0.012616
	200	0.13551	0.012929
	202	0.128277	0.013098
	204	0.121271	0.013342
	206	0.11449	0.01357
	208	0.107943	0.013828
	210	0.101631	0.014157
	212	0.09556	0.014287
	214	0.089729	0.014532
	216	0.08415	0.014723
	218	0.078819	0.014879
	220	0.073744	0.015035
	222	0.068925	0.015154
	224	0.064364	0.015389
	226	0.060068	0.015564
	228	0.056036	0.015643
	230	0.052272	0.015831
	232	0.048776	0.015876
	234	0.045552	0.016079
	236	0.042604	0.016107
	238	0.039931	0.016264
	240	0.037534	0.016295
	242	0.035415	0.016393
	244	0.03358	0.016515
	246	0.032021	0.016562
	248	0.030747	0.016599
	250	0.029754	0.016622
	252	0.029044	0.016647
	254	0.028617	0.016693

## Sheet: Panel b
			ACTIVITY
	Distance r		alpha6 = 0.010			alpha6 = 0.020			alpha6 = 0.030
			Correlation	Err		Correlation	Err		Correlation	Err
	0		-0.764696	0.081374		-0.762775	0.081271		-0.570069	0.213147
	2		-0.762775	0.081271		-0.754316	0.080957		-0.564637	0.211993
	4		-0.754316	0.080957		-0.742174	0.080445		-0.542252	0.20975
	6		-0.742174	0.080445		-0.732228	0.079742		-0.509224	0.205696
	8		-0.732228	0.079742		-0.717759	0.078778		-0.483903	0.196818
	10		-0.717759	0.078778		-0.697657	0.077617		-0.452611	0.18604
	12		-0.697657	0.077617		-0.678353	0.076486		-0.403629	0.175777
	14		-0.678353	0.076486		-0.658407	0.07542		-0.351675	0.163879
	16		-0.658407	0.07542		-0.635751	0.074475		-0.304528	0.149777
	18		-0.635751	0.074475		-0.61259	0.073618		-0.255938	0.134859
	20		-0.61259	0.073618		-0.589593	0.072864		-0.204374	0.120268
	22		-0.589593	0.072864		-0.566232	0.072333		-0.154378	0.106285
	24		-0.566232	0.072333		-0.542926	0.071964		-0.107881	0.092967
	26		-0.542926	0.071964		-0.520114	0.07172		-0.064533	0.08096
	28		-0.520114	0.07172		-0.497757	0.071627		-0.024074	0.071611
	30		-0.497757	0.071627		-0.475915	0.071643		0.012845	0.065363
	32		-0.475915	0.071643		-0.454739	0.071706		0.045769	0.062642
	34		-0.454739	0.071706		-0.434201	0.071785		0.074772	0.063894
	36		-0.434201	0.071785		-0.41432	0.07185		0.100183	0.068442
	38		-0.41432	0.07185		-0.395128	0.071859		0.122118	0.075157
	40		-0.395128	0.071859		-0.376556	0.071785		0.140631	0.083009
	42		-0.376556	0.071785		-0.358616	0.071589		0.155957	0.091244
	44		-0.358616	0.071589		-0.341389	0.071261		0.168402	0.099646
	46		-0.341389	0.071261		-0.324762	0.070806		0.178052	0.108026
	48		-0.324762	0.070806		-0.308707	0.070212		0.185157	0.115871
	50		-0.308707	0.070212		-0.293263	0.069497		0.189862	0.123076
	52		-0.293263	0.069497		-0.278421	0.068686		0.192391	0.129774
	54		-0.278421	0.068686		-0.2642	0.067778		0.192892	0.135625
	56		-0.2642	0.067778		-0.250598	0.066787		0.19157	0.140476
	58		-0.250598	0.066787		-0.237569	0.065748		0.188636	0.144409
	60		-0.237569	0.065748		-0.225165	0.064668		0.184274	0.147276
	62		-0.225165	0.064668		-0.213381	0.063564		0.178575	0.14902
	64		-0.213381	0.063564		-0.202197	0.062463		0.171801	0.149551
	66		-0.202197	0.062463		-0.191607	0.061387		0.164123	0.148695
	68		-0.191607	0.061387		-0.181618	0.06033		0.15555	0.146651
	70		-0.181618	0.06033		-0.172229	0.059297		0.146204	0.143423
	72		-0.172229	0.059297		-0.163378	0.058312		0.136488	0.13891
	74		-0.163378	0.058312		-0.155075	0.057381		0.126423	0.133299
	76		-0.155075	0.057381		-0.147458	0.056501		0.115764	0.12669
	78		-0.147458	0.056501		-0.140328	0.055665		0.104545	0.119267
	80		-0.140328	0.055665		-0.133583	0.054885		0.093429	0.111195
	82		-0.133583	0.054885		-0.127519	0.05417		0.082385	0.102683
	84		-0.127519	0.05417		-0.121974	0.0535		0.070632	0.093928
	86		-0.121974	0.0535		-0.116793	0.0529		0.058717	0.085193
	88		-0.116793	0.0529		-0.112161	0.052394		0.046988	0.076887
	90		-0.112161	0.052394		-0.107819	0.051948		0.034728	0.069324
	92		-0.107819	0.051948		-0.103737	0.051567		0.022571	0.063011
	94		-0.103737	0.051567		-0.100289	0.051288		0.01088	0.058743
	96		-0.100289	0.051288		-0.097224	0.051083		-0.001475	0.056964
	98		-0.097224	0.051083		-0.094295	0.050941		-0.014304	0.058212
	100		-0.094295	0.050941		-0.091779	0.0509		-0.026611	0.062282
	102		-0.091779	0.0509		-0.089616	0.050932		-0.038908	0.068351
	104		-0.089616	0.050932		-0.087686	0.051027		-0.051577	0.075802
	106		-0.087686	0.051027		-0.086045	0.051212		-0.064278	0.083683
	108		-0.086045	0.051212		-0.084623	0.051463		-0.076679	0.091593
	110		-0.084623	0.051463		-0.083434	0.051789		-0.088888	0.099711
	112		-0.083434	0.051789		-0.082506	0.052208		-0.101093	0.107665
	114		-0.082506	0.052208		-0.081619	0.052657		-0.112955	0.114825
	116		-0.081619	0.052657		-0.080918	0.053143		-0.124005	0.121357
	118		-0.080918	0.053143		-0.080543	0.053691		-0.134822	0.127443
	120		-0.080543	0.053691		-0.080143	0.054246		-0.145489	0.132843
	122		-0.080143	0.054246		-0.079707	0.054794		-0.154943	0.137389
	124		-0.079707	0.054794		-0.079399	0.055346		-0.163092	0.141136
	126		-0.079399	0.055346		-0.078991	0.055864		-0.170302	0.14417
	128		-0.078991	0.055864		-0.078588	0.056348		-0.17592	0.146274
	130		-0.078588	0.056348		-0.078321	0.056799		-0.179991	0.147452
	132		-0.078321	0.056799		-0.077864	0.057181		-0.182646	0.148003
	134		-0.077864	0.057181		-0.077259	0.05749		-0.183167	0.147646
	136		-0.077259	0.05749		-0.07668	0.057726		-0.181347	0.146067
	138		-0.07668	0.057726		-0.075966	0.05786		-0.17728	0.143678
	140		-0.075966	0.05786		-0.075073	0.057877		-0.170951	0.140588
	142		-0.075073	0.057877		-0.07403	0.057769		-0.162313	0.136542
	144		-0.07403	0.057769		-0.072805	0.057552		-0.151048	0.131289
	146		-0.072805	0.057552		-0.071418	0.057218		-0.137282	0.124928
	148		-0.071418	0.057218		-0.069868	0.056746		-0.121342	0.117976
	150		-0.069868	0.056746		-0.068145	0.05617		-0.103236	0.110572
	152		-0.068145	0.05617		-0.066256	0.055512		-0.083081	0.102593
	154		-0.066256	0.055512		-0.064168	0.054779		-0.061284	0.094685
	156		-0.064168	0.054779		-0.061917	0.053995		-0.037986	0.087477
	158		-0.061917	0.053995		-0.059491	0.053174		-0.013513	0.08168
	160		-0.059491	0.053174		-0.056946	0.05236		0.011629	0.078622
	162		-0.056946	0.05236		-0.054286	0.051608		0.037121	0.07903
	164		-0.054286	0.051608		-0.051421	0.050926		0.06281	0.082931
	166		-0.051421	0.050926		-0.04848	0.050356		0.088296	0.090392
	168		-0.04848	0.050356		-0.04558	0.049941		0.112824	0.100655
	170		-0.04558	0.049941		-0.042489	0.049699		0.135991	0.11242
	172		-0.042489	0.049699		-0.039324	0.049671		0.157911	0.124836
	174		-0.039324	0.049671		-0.036229	0.04986		0.17812	0.137312
	176		-0.036229	0.04986		-0.033108	0.050279		0.19616	0.149332
	178		-0.033108	0.050279		-0.03011	0.050952		0.211885	0.160146
	180		-0.03011	0.050952		-0.02731	0.051851		0.224923	0.168966
	182		-0.02731	0.051851		-0.024466	0.052971		0.235081	0.175781
	184		-0.024466	0.052971		-0.021705	0.054347		0.242711	0.180644
	186		-0.021705	0.054347		-0.019179	0.055942		0.247715	0.183229
	188		-0.019179	0.055942		-0.016802	0.057702		0.249761	0.183733
	190		-0.016802	0.057702		-0.014622	0.059641		0.248973	0.182337
	192		-0.014622	0.059641		-0.012575	0.061736		0.245828	0.178969
	194		-0.012575	0.061736		-0.010681	0.063957		0.240347	0.174291
	196		-0.010681	0.063957		-0.00931	0.066265		0.231958	0.168723
	198		-0.00931	0.066265		-0.00797	0.068639		0.221504	0.161998
	200		-0.00797	0.068639		-0.006418	0.07111		0.210632	0.154174
	202		-0.006418	0.07111		-0.005824	0.073576		0.197924	0.14608
	204		-0.005824	0.073576		-0.005621	0.076019		0.181671	0.138187
	206		-0.005621	0.076019		-0.00461	0.078504		0.165375	0.13001
	208		-0.00461	0.078504		-0.004147	0.08098		0.151007	0.121261
	210		-0.004147	0.08098		-0.004427	0.083415		0.134518	0.112802
	212		-0.004427	0.083415		-0.004595	0.085807		0.116265	0.104875
	214		-0.004595	0.085807		-0.005304	0.088155		0.099318	0.097306
	216		-0.005304	0.088155		-0.006044	0.09049		0.081593	0.090275
	218		-0.006044	0.09049		-0.005954	0.092799		0.063811	0.0839
	220		-0.005954	0.092799		-0.006431	0.094991		0.049077	0.078443
	222		-0.006431	0.094991		-0.007307	0.097125		0.034468	0.074385
	224		-0.007307	0.097125		-0.007527	0.099256		0.018791	0.072214
	226		-0.007527	0.099256		-0.007718	0.101295		0.004672	0.072347
	228		-0.007718	0.101295		-0.008254	0.10326		-0.007294	0.074551
	230		-0.008254	0.10326		-0.008636	0.105154		-0.018654	0.078931
	232		-0.008636	0.105154		-0.008854	0.106926		-0.029493	0.084862
	234		-0.008854	0.106926		-0.00911	0.108599		-0.039127	0.091599
	236		-0.00911	0.108599		-0.009374	0.11017		-0.047537	0.099377
	238		-0.009374	0.11017		-0.009492	0.111607		-0.05497	0.107601
	240		-0.009492	0.111607		-0.009589	0.112897		-0.061334	0.115632
	242		-0.009589	0.112897		-0.009725	0.114041		-0.066824	0.123583
	244		-0.009725	0.114041		-0.009773	0.115025		-0.071527	0.131312
	246		-0.009773	0.115025		-0.009765	0.115836		-0.075135	0.138289
	248		-0.009765	0.115836		-0.009775	0.11649		-0.077694	0.144339
	250		-0.009775	0.11649		-0.009729	0.116973		-0.079657	0.149307
	252		-0.009729	0.116973		-0.009765	0.117242		-0.081056	0.152939
